# Supplementary material
Source: PubMed Central journal article supplement (PMC2765099)
Supplement: 0908583106_0908583106SI.pdf [file 0908583106_0908583106SI.pdf]

# Supporting Information

Belizaire and Unanue 10.1073/pnas.0908583106

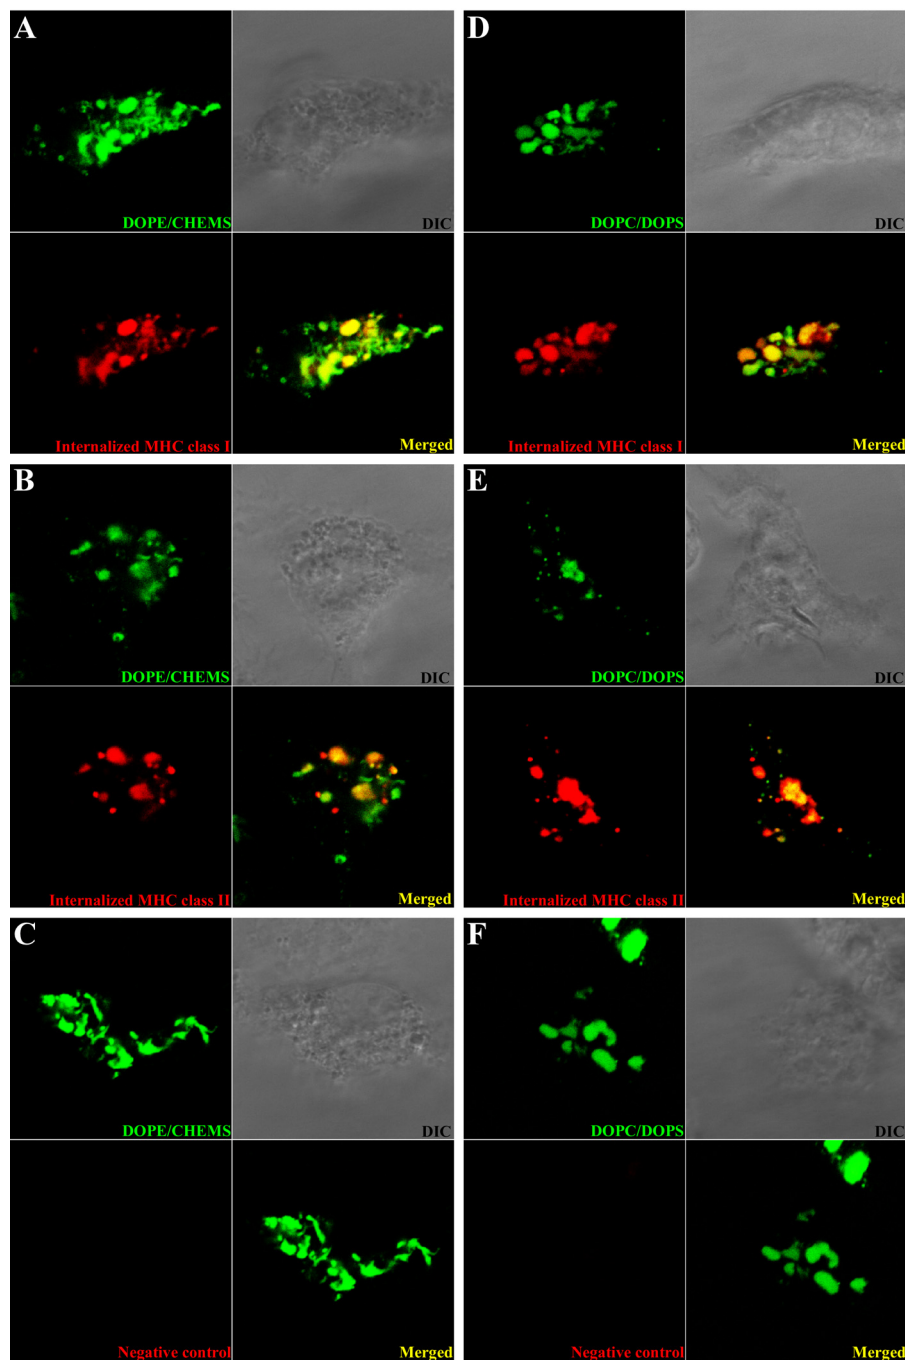

**Fig. S1.** Internalized MHC class I and II colocalize with dextran in DOPC/DOPS and DOPE/CHEMS liposomes. Surface-bound MHC class I (A and D) and class II (B and E) antibodies on peritoneal M $\phi$ s were internalized at 37 °C along with FITC-dextran encapsulated in DOPE/CHEMS (A–C) or DOPC/DOPS (D–F) liposomes. Irrelevant IgG (C and F) was used as a negative control for MHC internalization. Confocal images were acquired after 12 h of internalization. Similar results were obtained 1–2 h after internalization. (Magnification:  $\times 63$  oil,  $\times 4$  zoom.)

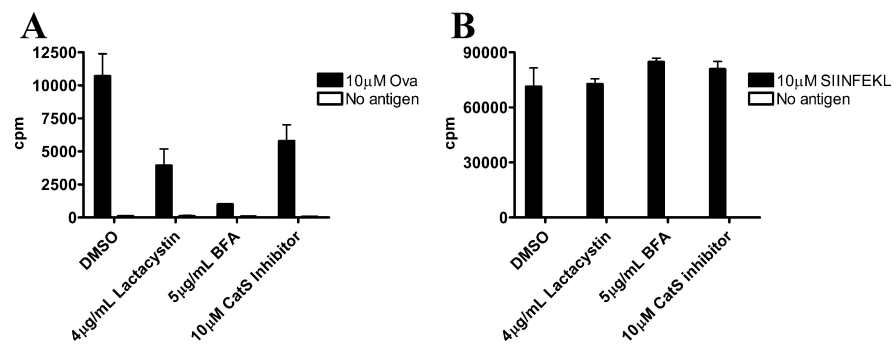

**Fig. S2.** MHC class I presentation of soluble Ova protein utilizes nascent MHC molecules, proteasomal processing, and CatS. Peritoneal M $\phi$ s from B6 mice were preincubated for 30 min with 4  $\mu$ g/mL lactacystin, 5  $\mu$ g/mL BFA, or 10  $\mu$ M CatS inhibitor before addition of 10  $\mu$ M soluble Ova (A) or SIINFEKL peptide (B) for 12–16 h. Cells were washed and cultured with SIINFEKL-specific CD8 T-cell hybridomas overnight, and IL-2 was measured in culture supernatants.

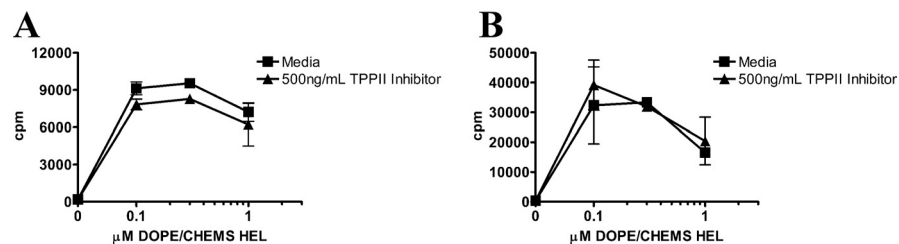

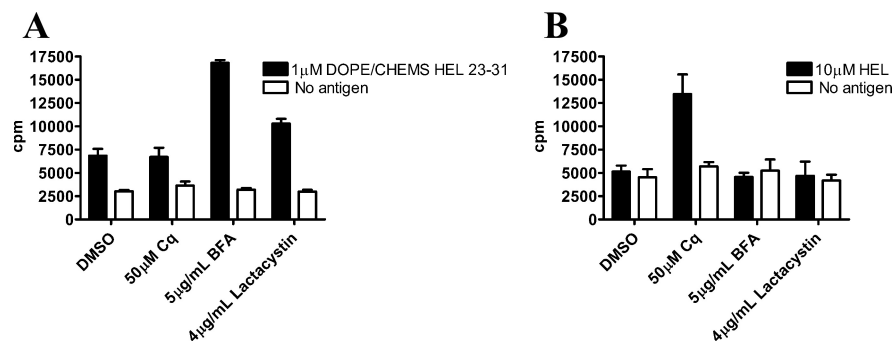

**Fig. S4.** Chloroquine (Cq) does not affect processing and MHC class I presentation of HEL 23–31 peptide encapsulated in acid-labile liposomes. Peritoneal M $\phi$ s from NOD mice were preincubated for 30 min with 50  $\mu$ M Cq, 5  $\mu$ g/mL BFA, or 4  $\mu$ g/mL lactacystin before addition of HEL 23–31 in DOPE/CHEMS liposomes (A) or soluble HEL (B) for 12–16 h. Cells were washed and cultured with CD8 T-cell hybridomas overnight, and IL-2 was measured in culture supernatants. (B) As a positive control, Cq treatment enables MHC class I presentation of soluble HEL.



**Table S1. MHC class I presentation of different exogenous antigens**

| Treatment              | Antigen     |             |                                 |                               |           |
|------------------------|-------------|-------------|---------------------------------|-------------------------------|-----------|
|                        | Soluble Ova | Soluble HEL | DOPE/CHEMS HEL (early endosome) | DOPC/DOPS HEL (late endosome) | HEL 23–31 |
| None                   | +           | –           | +                               | –                             | +         |
| BFA                    | Diminished  | –           | Enhanced                        | –                             | +         |
| Lactacystin/epoxomicin | Diminished  | –           | Enhanced                        | –                             | +         |
| TPPII inhibition       | n.d.        | –           | +                               | –                             | +         |
| Chloroquine            | n.d.        | +           | Diminished                      | +                             | +         |
| CatS inhibition        | Diminished  | –           | Enhanced                        | –                             | +         |
| CatB/L inhibition      | n.d.        | –           | +                               | –                             | +         |

+, presentation; –, no presentation; n.d., not determined
